# Supplementary material for: Levitation and controlled MHz rotation of a nanofabricated rod by a high-NA metalens
Source: Research Square preprint supplement (doi:10.21203/rs.3.rs-4313334/v1), 2024-06-13
Supplement: Supplementary file 1 [file d8da0abb9dc15fe4c489f634.docx]

**Levitation and controlled MHz rotation of a nanofabricated rod by a high-NA metalens**

Hailong Pi,1 Chuang Sun,1 Kian Shen Kiang,1 Tiberius Georgescu,2 Bruce (Jun-Yu) Ou,2 Hendrik Ulbricht,2 Jize Yan1*

1School of Electronics and Computer Science, University of Southampton, SO17 1BJ, UK.

2School of Physics and Astronomy, University of Southampton, Southampton, SO17 1BJ, United Kingdom.

*Corresponding Authors: J.Yan@soton.ac.uk

**1. Calculation of nanorod’s rotation frequency**

The rotation of levitated nanorods is induced by the torque transferred from the circularly polarized light. Equation (3) in the main text shows that under circularly polarized input, the optical torque depends on the intensity of the input light and the polarizability of the particle.

Here, we determine the intensity of the input light through the mechanical oscillation frequency of the particle in the z-direction. In a vacuum environment, the oscillation frequency of the particle along the z-axis can be expressed as1

|  |  | (S1) |
| --- | --- | --- |

where c is the propagation speed of light in a vacuum, ρ is the density of the particle, nr is the relative refractive index of the particle, λ is the wavelength of the input light, w0 is the waist radius of the input light, and P is the power of the input light.

In Figure 4(a) of the main text, the oscillation frequency of the particle along the z-axis is 38.5 kHz. The light power at the focal point is 0.075 W. The parameters used in the calculation are shown in Table S1.

The polarizability of the particle along the j axis used in Eq. (2) can be expressed as1-2

|  |  | (S2) |
| --- | --- | --- |

where

The rotation damping rate for diffuse reflection of gas molecules is3

|  |  | (S3) |
| --- | --- | --- |

The rectangular nanorod’s momentum of inertia is

|  |  | (S4) |
| --- | --- | --- |

where the W, H and L are the nanorod’s width, height and length respectively. pgas is the pressure inside the vacuum chamber, M is the mass of the rectangular nanorod, mg is the mass of the gas molecule, kB is the Boltzmann constant, T is the gas temperature.

Table S1: List of all the calculation parameters

| **Quantity** | **Value** | **Unit** |
| --- | --- | --- |
| *W* | 214 | *nm* |
| *H* | 220 | *nm* |
| *L* | 753 | *µm* |
| *ε0* | 8.85×10-12 | *F/m* |
| *P* | 0.075 | *W* |
| *w0* | 800 | *nm* |
| *c* | 3×108 | *m/s* |
| *nr* | 3.746 |  |
| *λ0* | 1550 | *nm* |
| *ρ* | 2330 | *kg/m3* |
| *mg* | 4.68×10-26 | *kg* |
| *kB* | 1.38×10-23 | *J/K* |
| *T* | 300 | *K* |

**References**

(1) Ahn, J. Spin Optomechanics of Levitated Nanoparticles. Purdue University Graduate School, 2020.

(2) Bohren, C. F.; Huffman, D. R., *Absorption and Scattering of Light by Small Particles*. John Wiley & Sons: 2008.

(3) Kuhn, S.; Kosloff, A.; Stickler, B. A.; Patolsky, F.; Hornberger, K.; Arndt, M.; Millen, J., Full Rotational Control of Levitated Silicon Nanorods. *Optica* **2017,** *4*, 356-360.
